# Supplementary material
Source: Research Square preprint supplement (doi:10.21203/rs.3.rs-9136352/v1)
Supplement: Supplementary file 1 [file 5fe3c6177ecc483a04fc1318.docx]

**Supplementary Table 1**: List of primers

| **Targets** | **Primer names** | **Sequences (5′→3′)** | **Applications** |
| --- | --- | --- | --- |
| PsGALS3 | PsGALS3-C-F | GGCAATTUCTGTACCTTCTCGGAGCCGC | USER cloning |
| PsGALS3-C-R | GGGTATTUCAAAGAAGAACATCCATTTCCCC |
| PsGALS3-Sq-F | CGGTGCTCAATTCGCTATCGG | Semi-qRT-PCR |
| PsGALS3-Sq-R | TAGCCTACGTGGTTGCACTGC |
| PsGALS3-q-F | ATCGGTGCTCAATTCCCTATC | RT-qPCR |
| PsGALS3-q-R | AGCTTTTCAATTCCCCATTTCCTAT |
| β-tubulin | TUB-F1 | ACTGTGATTGCTTGCAGGGT | Reference genes for RT-PCR |
| TUB-R1 | ACATAGCAGATGCGGTGAGG |
| TUB-F2 | TGCAGATGAGGTTATGGTTCTTGA |
| TUB-R2 | TGTTACACCAGACATAGTTGCTG |
| TFIIA | TFIIA-F1 | GCAACCTCCTTCTCCTTGGAT |
| TFIIA-R1 | TCTTCCCGTCCTTCCACATAA |
| TFIIA-F2 | CTCAGCAAGATGGAGCTGGT |
| TFIIA-R2 | CCAAGTCTGCGGGCATTTTC |
| PP2A | PP2A-F1 | AAGTGACCAAGTTCTCCCGC |
| PP2A-R1 | GACCGGTGCCATTCCCATTA |

Note: C: cloning primers; Q: RT-qPCR primers; S: semi-quantitative RT-PCR; F: forward and R: reverse primers.
